# Supplementary material for: Biodegradable and injectable polymer–liposome hydrogel: a promising cell carrier
Source: Royal Society of Chemistry journal article supplement (doi:10.1039/c5py01773d), 2016-01-01
Supplement: c5py01773d1.pdf [file c5py01773d1.pdf]

## Electronic Supplementary Information

### **Biodegradable and injectable polymer–liposome hydrogel: a promising cell carrier**

Yong-Hao Ma,<sup>a</sup> Jingjing Yang,<sup>a,c</sup> Bolin Li,<sup>a</sup> Yao-Wen Jiang,<sup>a</sup> Xiaolin Lu<sup>\*a</sup> and Zhan Chen<sup>\*b</sup>

<sup>a</sup> *State Key Laboratory of Bioelectronics, School of Biological Science and Medical Engineering, Southeast University, Nanjing 210096, China. Email: lxl@seu.edu.cn*

<sup>b</sup> *Department of Chemistry, University of Michigan, 930 North University Avenue, Ann Arbor, Michigan 48109, United States. Email: zhanc@umich.edu*

<sup>c</sup> *School of Chemistry and Chemical Engineering, Southeast University, Nanjing 211189, China*

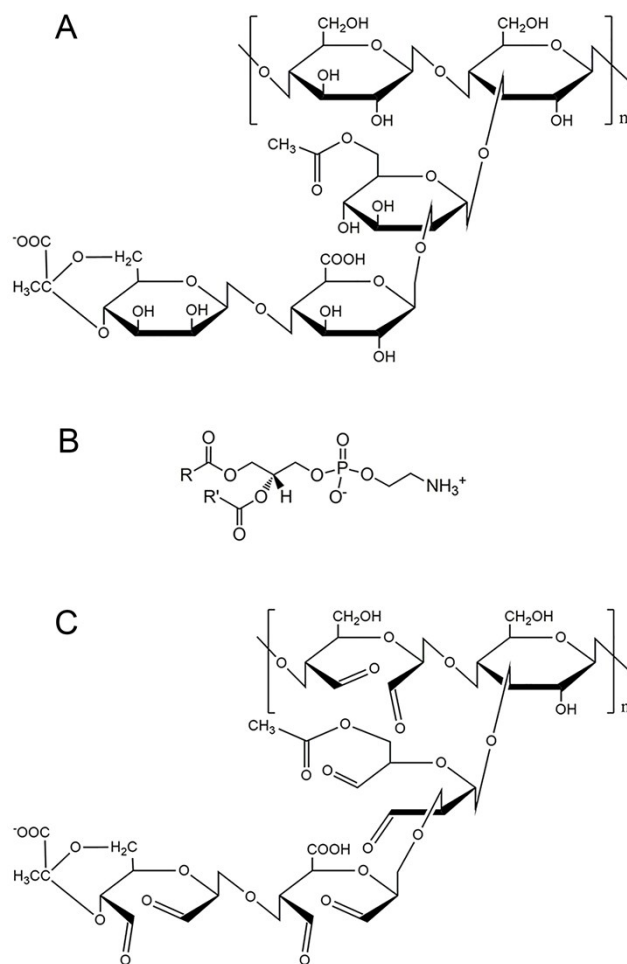

**Fig. S1** (A) Chemical formulas of XA (A), PE (B), and ALD-XA(C). R and R' stand for the same or different carbon chains, respectively.

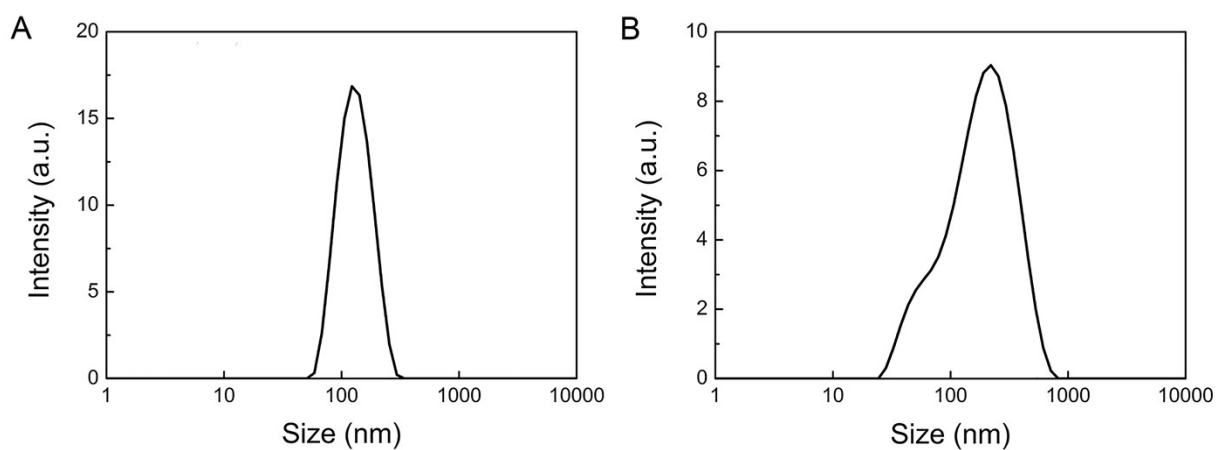

**Fig. S2** DLS data for PE liposomes prepared by extrusion (A) and released from the xanthan gum-based liposome hydrogel degraded by papain. The average hydrodynamic diameters of them are ~ 121 nm (A) and ~ 137 nm (B), respectively.

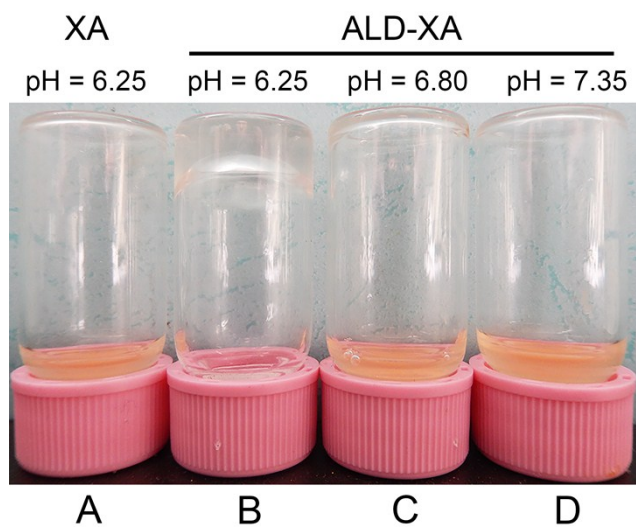

**Fig. S3** Gelation experiment of ALD-XA via reaction with carboxylated chitosan confirming the existence of the aldehyde groups in ALD-XA. Mixtures of carboxylated chitosan solution with XA in pH = 6.25 (A) or ALD-XA in different pH conditions of 6.25 (B), 6.80 (C), 7.35(D).
